## **Actigraphy in brain-injured patients – A valid measurement for assessing circadian rhythms?**

M.Sc. Monika Angerer<sup>1,2</sup>, Dr. Christine Blume<sup>2,3,4</sup>, M.Sc. Marion Raml<sup>1</sup>, M.D. Gerald Pichler<sup>5</sup>, M.D. Alexander B. Kunz<sup>6,7</sup>, M.D. Monika Scarpatetti<sup>5</sup>, Univ.-Prof. M.D. Eugen Trinkka<sup>2,6</sup>, Univ.-Prof. Dr. Manuel Schabus<sup>1,2</sup>

<sup>1</sup> University of Salzburg; Department of Psychology; Laboratory for Sleep, Cognition and Consciousness Research; Salzburg, Austria

<sup>2</sup> University of Salzburg; Centre for Cognitive Neuroscience Salzburg (CCNS); Salzburg, Austria

<sup>3</sup> Centre for Chronobiology; Psychiatric Hospital of the University of Basel; Basel, Switzerland

<sup>4</sup> Transfaculty Research Platform Molecular and Cognitive Neurosciences; University of Basel; Basel, Switzerland

<sup>5</sup> Geriatric Health Centres of the City of Graz; Albert Schweitzer Clinic; Apallic Care Unit; Graz, Austria

<sup>6</sup> Department of Neurology; Paracelsus Medical University; Christian Doppler Medical Center; Salzburg, Austria

<sup>7</sup> Gunther Ladurner Nursing Home; Salzburg, Austria

### **Corresponding Author:**

Univ.-Prof. Dr. Manuel Schabus  
University of Salzburg  
Laboratory for “Sleep, Cognition and Consciousness Research”  
Hellbrunner Str. 34  
A-5020 Salzburg  
Email: [manuel.schabus@sbg.ac.at](mailto:manuel.schabus@sbg.ac.at)  
T: +43662 / 8044 5113

### **Authors' Email-Addresses:**

[monika.angerer@sbg.ac.at](mailto:monika.angerer@sbg.ac.at); [christine.blume@sbg.ac.at](mailto:christine.blume@sbg.ac.at); [marion\\_raml@yahoo.de](mailto:marion_raml@yahoo.de);  
[Gerald.Pichler@stadt.graz.at](mailto:Gerald.Pichler@stadt.graz.at); [a.kunz@salk.at](mailto:a.kunz@salk.at); [monika.scarpatetti@stadt.graz.at](mailto:monika.scarpatetti@stadt.graz.at);  
[eugen@trinka.at](mailto:eugen@trinka.at)

## **Abstract**

### ***Objective***

Actigraphy has received increasing attention in classifying rest-activity cycles. However, in patients with disorders of consciousness (DOC), actigraphy data may be considerably confounded by external movements. Consequently, this study verified whether circadian rhythmicity is (still) visible in actigraphy data from DOC patients after correcting for these external movements.

### ***Methods***

Wrist actigraphy was recorded over 7-8 consecutive days in DOC patients (diagnosed with unresponsive wakefulness syndrome [UWS;  $n=19$ ] and [exit] minimally conscious state [MCS/EMCS;  $n=11$ ]). Presence and actions of clinical and research staff as well as visitors were indicated using a tablet in the patient's room. Following removal and interpolation of external movements, non-parametric rank-based tests were computed to identify differences between circadian parameters of uncorrected and corrected actigraphy data.

### ***Results***

Uncorrected actigraphy data overestimated the *interdaily* stability and *intradaily* variability of patients' activity and underestimated the deviation from a circadian 24h rhythm. That is only 5/30 (17%) patients deviated more than 1h from 24h in the uncorrected data, whereas this was the case for 17/30 (57%) patients in the corrected data. When contrasting diagnoses based on the corrected dataset, stronger circadian rhythms and higher activity levels were observed in MCS/EMCS as compared to UWS patients. Day-to-night differences in activity were evident for both patient groups.

## ***Conclusion***

Our findings suggest that uncorrected actigraphy data overestimates the circadian rhythmicity of patients' activity as nursing activities, therapies, and visits by relatives follow a circadian pattern itself. Therefore, we suggest correcting actigraphy data from patients with reduced mobility to arrive at meaningful results.

## 1 **Introduction**

2

3         In the last decades, the measurement of physical activity, so-called actigraphy, has  
4 received increasing attention for the classification of vigilance states in healthy individuals  
5 (see reference 1 for a review). Recently, actigraphy was also used for the investigation of  
6 day/night patterns as well as circadian rhythms (i.e. rhythms with a period length of  
7 approximately 24 h) in patients following severe brain injury<sup>2-5</sup>. As those patients often need  
8 full-time care, actigraphy measures are probably highly influenced by external movements in  
9 this patient population, wherefore in this study we sought to systematically control for  
10 external movements.

11         Severe brain injury can cause coma and, upon recovery, longer lasting changes in  
12 consciousness, which can be summarized as “disorders of consciousness (DOC)”. In a  
13 simplified approach, consciousness is thought to require both adequate levels of wakefulness  
14 and awareness<sup>6</sup>. More precisely, wakefulness refers to some degree of arousal at brain level  
15 (e.g. eye-opening, limb movements) and awareness denotes the ability to have a conscious  
16 experience of any kind. While brain-dead or comatose patients are characterized by absent  
17 arousal and awareness, patients with an unresponsive wakefulness syndrome (UWS; formerly  
18 often referred to as vegetative state) show some return of arousal (i.e. alternating phases of  
19 sleep [closed eyes] and wakefulness [opened eyes]), however, without signs of awareness. In  
20 a minimally conscious state (MCS), cognitively mediated behavior indicating awareness  
21 occurs inconsistently, but is reproducible or long enough to be differentiated from reflexive  
22 behavior (e.g. response to command, verbalizations, visual pursuit)<sup>7</sup>. If patients are able to  
23 functionally use objects and communicate, their state is denoted exit MCS (EMCS)<sup>8</sup>. Thus,  
24 while UWS patients are assumed to be unconscious, MCS and EMCS patients show signs of  
25 consciousness. However, distinguishing between UWS and MCS is still a challenging task.  
26 Until now, behavioral methods like the “Coma Recovery Scale – Revised” (CRS-R)<sup>9</sup> and the

27 “Glasgow Coma Scale” (GCS)<sup>10</sup> remain the best available tools for clinical diagnoses.  
28 Unfortunately, the rate of misdiagnoses is still high (~40%)<sup>11</sup> if behavioral scales are not  
29 performed by well-trained professionals. Therefore, the quest for ways to improve the validity  
30 of such assessments remains an important issue. As consolidated periods of wakefulness and  
31 sleep resulting from well-entrained circadian rhythms, seem crucial for adequate arousal  
32 levels and thus (conscious) wakefulness, circadian rhythms have been the focus of recent  
33 research in DOC patients. Research from our group<sup>5, 12</sup> suggests that a better integrity of  
34 patients’ circadian melatonin(-sulfate) and temperature rhythms is indeed related to a richer  
35 behavioral repertoire (as measured with the CRS-R). Knowing a patient’s circadian rhythm in  
36 turn has been suggested to help finding the optimal time for behavioral assessments and  
37 therapies as cognitive functions also vary with the time of day<sup>12-14</sup>. However, besides  
38 temperature and melatonin rhythms, variability within a day can also be observed in other  
39 parameters in DOC patients as for example in blood pressure, heart rate and body  
40 movements<sup>3, 15, 16</sup>.

41 Body movements can be monitored by actigraphy, which is frequently used in the  
42 clinical setting for evaluating the rest-activity cycle (e.g. in insomnia or circadian rhythm  
43 disorders) with the big advantage of being a cost-efficient and easy to use tool suitable for  
44 long-term investigations. More precisely, an actigraph, worn on the wrist or ankle allows the  
45 continuous recording of data across days, weeks and even months in a natural setting without  
46 restricting mobility and daily life routine of the participants.

47 Previous studies investigating rest-activity cycles in DOC patients using actigraphy  
48 found that (i) the sleep-wake cycle deteriorates with decreasing consciousness level<sup>2</sup>, (ii) only  
49 patients with traumatic brain injuries (TBI) show significant day-night differences (i.e.  
50 stronger motor activity during day time [7 am – 11 pm] than during night-time [11 pm – 7  
51 am]) whereas no change was observed in patients with anoxic-ischemic brain injuries (AI)<sup>4</sup>  
52 and (iii) circadian sleep-wake cycles (that is, not only day-to-night variations but the

53 investigation of fluctuations in wrist actigraphy-derived physical activity over several days  
54 using cosinor rhythmometry analyses) are more impaired in UWS patients and patients with  
55 non-traumatic brain injuries (NTBI) as compared to MCS patients and patients with TBI<sup>3</sup>.  
56 Thus, Cruse et al.<sup>3</sup> suggest that actigraphy should be considered as an alternative for assessing  
57 sleep-wake cycles in DOC patients and appeal to also determine the prognostic utility of wrist  
58 actigraphy for UWS and MCS patients in future studies.

59 However, the use of actigraphy in DOC patients may be severely limited by several  
60 factors. First, DOC patients often suffer from severe motor impairments, spasticity and the  
61 use of muscle relaxants. Second, as most of them are bedridden and often need full-time care  
62 in hospitals or nursing homes, actigraphy data is likely to be confounded by external  
63 movements due to nursing activities, therapies or movements initiated by visitors. The latter  
64 issue becomes particularly crucial when actigraphy data are used to make inferences about  
65 patients' circadian rhythms. This is because the rhythmicity might rather reflect daily patterns  
66 of e.g. nursing activities or therapies than a circadian rhythm of the patient itself.  
67 Unfortunately, correcting for external movements is challenging and the previously published  
68 findings may thus be biased towards overestimating rhythmicity. In the current paper, we  
69 therefore sought to systematically control for external movements and to assess the magnitude  
70 of the introduced bias by comparing corrected and uncorrected actigraphy-derived measures.  
71 Eventually, we aimed at revealing whether circadian rhythmicity can be identified in MCS  
72 and/or UWS patients using actigraphy data even if artificial biases are carefully controlled for.

73

## 74 **Methods and Materials**

75

### 76 ***Patients***

77 From a total of 30 patients one patient (P26) had to be excluded because hardly any  
78 activity was left after cleaning the data from external movements (cf. *Tables S1, S2* and

79 *Figure e-2* in the supplementary material). Thus 29 patients (13 women) aged 19-78 (mdn =  
80 55 years) from long-term care facilities in Austria were included in the study sample with 18  
81 patients who were diagnosed with UWS (7 women), 7 were in a MCS (4 women) and 4 in an  
82 EMCS (2 women). Note that the data has been used in two previous publications, where we  
83 studied circadian rhythms in DOC patients but without focusing on actigraphy data<sup>5, 12</sup>.  
84 Informed consent was obtained from the patients' legal representatives and the study had been  
85 approved by the local ethics committees. Please note that MCS and EMCS patients were  
86 combined to a single group in the analyses as we sought to analyze differences between  
87 unconscious UWS and (minimally) conscious (E)MCS patients. For more details on the study  
88 sample please see *Table 1*.

89

90 **Table 1.**  
91 ***Demographic information.***

| Patient ID | Age | Gender | Etiology | Time since injury (months) | Diagnosis | CRS-R sum score |
|------------|-----|--------|----------|----------------------------|-----------|-----------------|
| P1         | 43  | M      | NTBI     | 39.0                       | EMCS      | 11              |
| P2         | 72  | F      | NTBI     | 10.0                       | UWS       | 6               |
| P3         | 25  | M      | NTBI     | 99.0                       | UWS       | 6               |
| P4         | 34  | M      | TBI      | 15.0                       | UWS       | 6               |
| P5         | 60  | M      | NTBI     | 7.0                        | UWS       | 7               |
| P6         | 49  | F      | NTBI     | 16.0                       | UWS       | 6               |
| P7         | 50  | M      | NTBI     | 4.0                        | UWS       | 3               |
| P8         | 59  | F      | NTBI     | 6.0                        | UWS       | 6               |
| P9         | 60  | M      | NTBI     | 7.0                        | UWS       | 7               |
| P10        | 68  | M      | NTBI     | 5.0                        | UWS       | 6               |
| P11        | 70  | F      | TBI      | 7.0                        | UWS       | 3               |
| P12        | 48  | F      | NTBI     | 37.0                       | UWS       | 5               |
| P13        | 66  | M      | NTBI     | 2.0                        | UWS       | 7               |
| P14        | 20  | M      | TBI      | 56.0                       | MCS       | 13              |
| P15        | 71  | M      | NTBI     | 24.0                       | UWS       | 1               |
| P16        | 55  | F      | TBI      | 168.0                      | MCS       | 17              |
| P17        | 70  | F      | NTBI     | 15.0                       | UWS       | 3               |
| P18        | 51  | M      | TBI      | 54.0                       | UWS       | 4               |
| P19        | 61  | F      | NTBI     | 9.0                        | EMCS      | 23              |
| P20        | 68  | M      | NTBI     | 415.0                      | UWS       | 4               |
| P21        | 53  | F      | NTBI     | 10.5                       | MCS       | 13              |
| P22        | 68  | F      | TBI      | 13.5                       | MCS       | 9               |
| P23        | 71  | F      | TBI      | 2.5                        | EMCS      | 23              |

|     |    |   |      |       |      |    |
|-----|----|---|------|-------|------|----|
| P24 | 53 | F | NTBI | 82.0  | UWS  | 5  |
| P25 | 37 | M | TBI  | 197.0 | MCS  | 9  |
| P26 | 46 | F | NTBI | 3.0   | UWS  | 4  |
| P27 | 19 | F | TBI  | 17.0  | MCS  | 8  |
| P28 | 78 | M | NTBI | 13.0  | MCS  | 9  |
| P29 | 27 | M | NTBI | 1.5   | UWS  | 4  |
| P30 | 54 | M | TBI  | 10.0  | EMCS | 20 |

92 M = male; F = female; NTBI = non traumatic brain injury; TBI = traumatic brain injury; UWS = unresponsive  
93 wakefulness syndrome; MCS = minimally conscious state; EMCS = Exit MCS; CRS-R = Coma Recovery Scale  
94 – Revised.

95

## 96 *Experimental Design*

97 The study protocol comprised seven to eight full days (hereinafter “study week”) during  
98 which actigraphy was assessed continuously (for further measures recorded see reference 5).  
99 Patients’ behavioral repertoire or level of consciousness was assessed with the CRS-R in the  
100 morning of day 6 and in the afternoon of day 7 during the study week. Besides this, multiple  
101 additional CRS-R assessments (i.e. 10 additional assessments) were obtained in 16 patients (8  
102 women; P2, P4, P6, P8, P10, P12, P14, P16, P18; P24-P30) on two consecutive days  
103 following the study week (note that multiple CRS-R assessments are not available for all  
104 patients as they were added to the study protocol later). Illuminance was kept <500 lux at eye  
105 level during the day (7 am – 9 pm) and <10 lux during the night (9 pm – 7 am), which was  
106 ensured by continuous measurements with light sensors (wGT3X-BT Monitor, ActiGraph  
107 LLC., Pensacola, USA) and spot checks with a luxmeter (Dr. Meter, Digital  
108 Illuminance/Light Meter LX1330B). For further information on light levels please refer to the  
109 supplementary material.

110

## 111 *Behavioral Assessment and Data Analysis*

112

### 113 *Coma Recovery Scale – Revised*

114 The patients’ neurophysiological state was assessed behaviorally with the CRS-R<sup>9</sup>. It is  
115 composed out of six subscales reflecting auditory, visual, motor, oromotor, communication



116 and arousal functions that altogether make up 23 items. Whereas the lowest item on each  
117 subscale represents reflexive behavior, the highest item indicates cognitively mediated  
118 behavior. Patients are tested in a hierarchical manner; meaning that the examiner starts with  
119 the highest item of each subscale and moves down the scale until the patient's response meets  
120 the criteria for one item. The scores of all subscales sum up to a maximum score of 23. The  
121 assessment was done twice by two trained experts in all patients, with 10 additional  
122 assessments being available for 16 patients. For the following analyses we used those CRS-R  
123 assessments where the patients showed the highest behavioral reactivity (e.g. as characterized  
124 by the best diagnosis or highest sum score) as this is thought to best represent the true state of  
125 the patient. The highest CRS-R score and diagnosis across the whole study period of each  
126 patient are shown in *Table 1*. For further information on multiple CRS-R assessments please  
127 refer to the supplementary material.

128

### 129 *Actigraphy*

130 We recorded actigraphy with a sampling rate of 30 Hz using GT3X+ devices  
131 (ActiGraph LLC., Pensacola, FL 32502). The actigraph was placed on the wrist of the arm  
132 with the greatest mobility and least spasticity. If both arms were equally mobile, it was placed  
133 on the wrist of the dominant hand. If the legs were more mobile it was placed on the ankle of  
134 the most mobile leg. Actigraphs recorded continuously during the whole “study week” and  
135 were only taken off if the patients were showered or bathed. To monitor external movements  
136 and remove artifacts resulting from them, we recorded all events deemed relevant in the  
137 patient room using an application (<https://github.com/wolli2710/HospitalTracker>) that  
138 enabled clinical and research staff as well as visitors to indicate the type of activity that was  
139 performed by simply tapping the screen of a tablet in the patient room. Specifically, we had  
140 start and end buttons for visits, nursing activities, actigraphy (i.e. to mark if the actigraph was  
141 taken off for showering or bathing), therapy, mobilizations in the wheelchair and

142 mobilizations outside the building (e.g. if they went for a walk with the patient). Furthermore,  
143 we had “single press buttons” (i.e. no start and stop option; only needed to be pressed once at  
144 the time of occurrence) for the administration of medication, nutrition as well as for lights on  
145 and out, eyes open and closed (cf. *Figure e-1* in the supplementary material to get an  
146 impression of the graphical user interface of the tablet). Upon tapping the screen, a time  
147 stamp was generated, which allowed us to correct the actigraphy data post hoc.

148       Cleaning and analysis of actigraphy data was done in R version 3.4.2<sup>17</sup>. After  
149 integrating actigraphy and tablet data into one single dataset, the actigraphy data was down-  
150 sampled to 1/60 Hz (i.e. one value per minute). The actigraphy values of (i) the time spans  
151 during which clinical staff or visitors were with the patient, (ii) the patient was put into a  
152 wheelchair or back into bed, (iii) the CRS-R assessments took place as well as (iv) the times  
153 when the actigraphs had been taken off for body care, were removed. As the calculation of  
154 interdaily stability (IS; see below) requires a dataset without missing data, the first half of the  
155 removed values was replaced by the median activity during the 10 min preceding the event  
156 and the second half was replaced by the median activity during the 10 min following the end  
157 of the event. Importantly, to account for the issue that clinical staff or visitors indicated their  
158 presence too late, we additionally removed and imputed 5 min before and after each nursing  
159 activity as well as 10 min before and after each visit or usage of the wheelchair. This  
160 automatic artefact correction was followed by a visual screening and manual correction of  
161 residual artefacts. Thus, the resulting dataset can be assumed to be free from external  
162 movements representing only the “true” internal motor activity of the patient (cf. *Figure 1* for  
163 an illustration of our correction procedure). For the analyses of the uncorrected actigraphy  
164 data we down-sampled the data to 1/60 Hz. Thus, we arrived at a corrected as well as at an  
165 uncorrected dataset for each patient, which we used for the calculation of the following  
166 parameters using R.

167

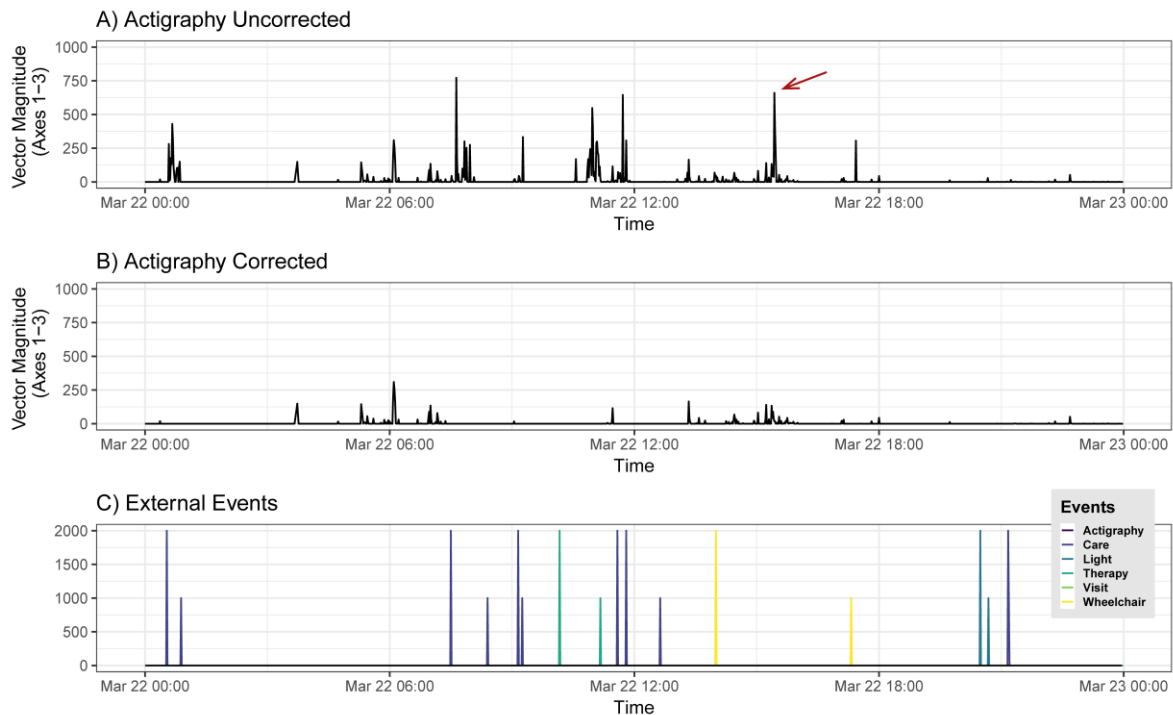

168  
169 **Figure 1. Graphical representation of the manual and automatic artefact correction of a 24 h actigraphy**  
170 **recording.** A) Uncorrected actigraphy data with the time of day being depicted on the x-axis and the amplitude  
171 of the motor activity on the y-axis. B) Corrected actigraphy data after automatic (according to the tablet data)  
172 and manual artefact correction (marked with a red arrow). C) External events recorded by the tablet in the patient  
173 room with longer vertical lines representing the start and shorter vertical lines the stop of the respective event.

174

### 175 *Interdaily Stability and Intradaily Variability*

176 Interdaily stability (IS) and intradaily variability (IV) are non-parametric measures<sup>18</sup>,  
177 whose calculation is implemented in the R package ‘nparACT’<sup>19</sup>. In more detail, IS reflects  
178 how well a patient’s activity rhythm is entrained to a 24 h zeitgeber (i.e. the light-dark cycle)  
179 as indexed by values ranging between 0 for Gaussian noise and 1 for perfect IS. In contrast,  
180 IV quantifies the fragmentation of a rest-activity pattern. IV converges to 0 for a perfect sine  
181 wave and approaches 2 for Gaussian noise. It may even be higher than 2 if a definite ultradian  
182 component with a period length of 2 h is present in the rest-activity cycle. For individual  
183 patients’ results please refer to *Tables S1* and *S2* in the supplementary material.

184

### 185 *Lomb-Scargle Periodograms*

186 To detect rhythmicity in our data, we computed Lomb-Scargle periodograms<sup>20, 21</sup>. For  
187 each patient, we calculated two parameters using the “lomb” package available for R<sup>22</sup>: (1)

188 normalized power and (2) peak period. The normalized power describes the fit of a sine wave  
189 to the data. It is maximal where the sum of squares of the fitted sine wave to the data is  
190 minimal. For calculation of the period length of each patient's activity rhythm, we looked for  
191 significant peaks in the normalized power of the periodogram and extracted the period length  
192 of the significant peak, which was closest to 24 h (i.e. as circadian rhythms should be  
193 entrained to a 24 h cycle in a natural setting which is close to the intrinsic period of the human  
194 circadian pacemaker that is on average 24.18 h<sup>23</sup>). We set the oversampling factor to 100 and  
195 the significance level to  $\alpha = 0.001$ . The individual patients' results are displayed in *Tables S1*  
196 and *S2* in the supplementary material. For further information on the analyses please refer to  
197 the supplementary material of Blume et al.<sup>5</sup>

198

#### 199 *Mean Activity*

200 Mean Activity was calculated separately for day (7 am – 9 pm) and night-time (9 pm –  
201 7 am) and simply reflects the mean of the measured activity during the study week (arbitrary  
202 units). It takes the intensity and number of movements into account. For individual patients'  
203 results please refer to *Tables S1* and *S2* in the supplementary material.

204

#### 205 *Statistical Analyses*

206 Statistical analyses were done in R. We investigated differences in actigraphy (IS, IV,  
207 normalized power, deviation of the peak period from a 24 h rhythm, mean activity) between  
208 corrected and uncorrected data as well as day-night differences in mean activity using  
209 Wilcoxon signed-rank test. Differences between diagnoses (i.e., UWS vs. MCS/EMCS) were  
210 investigated using Mann-Whitney U test. To check if the differences in actigraphy data  
211 between UWS and MCS/EMCS patients are also visible on a subscale level, we also  
212 investigated the correlation between patients' CRS-R scores (sum score as well as subscale  
213 scores) and actigraphy data using Kendall's Tau. The significance level was  $\alpha = .05$  (two-

214 sided) with  $p$ -values  $.05 < p \leq .1$  being denoted trends. Regarding effect sizes,  $r \left( \left| \frac{z}{\sqrt{N}} \right| \right)$  was  
215 calculated for the results of Wilcoxon signed-rank test and Mann-Whitney U test. According  
216 to Cohen<sup>24</sup>, the following conventions are applied when interpreting  $r$ : small effect:  $r = .1$ ;  
217 medium effect:  $r = .3$ ; large effect:  $r = .5$ .

218

## 219 **Results**

220

### 221 ***Circadian Rhythms***

222 Comparisons between corrected and uncorrected actigraphy data revealed that interdaily  
223 stability (IS) ( $Z(N=29)=-2.96, p=.003, r=.55$ ; cf. *Figure 2 A*) and IV ( $Z(N=29)=-4.22, p<.001,$   
224  $r=.78$ ; cf. *Figure 2 B*) were higher in the uncorrected data than in the corrected data. The  
225 period length was closer to 24 h in the uncorrected data ( $Z(N=29)=-3.29, p=.001, r=.61$ ;  
226 median deviation from 24 h: uncorrected data=0.41 h, corrected data=1.11 h; cf. *Figure 3 A*).  
227 The strength of the circadian rhythm (i.e. normalized power) did not differ between datasets  
228 ( $Z(N=29)=-.86, p=.39, r=.16$ ; cf. *Figure e-3* in the supplementary material).

229 Contrasts between diagnoses showed that intradaily variability (IV) was higher in UWS  
230 patients than in MCS/EMCS patients in the uncorrected data ( $Z(n_1=11, n_2=18)=-2.20, p=.028,$   
231  $r=.41$ ; cf. *Figure e-4 C* in the supplementary material). This was not the case in the corrected  
232 data ( $Z(n_1=11, n_2=18)=-1.42, p=.157, r=.26$ ; cf. *Figure e-4 D* in the supplementary material).  
233 Furthermore, while MCS/EMCS patients showed a stronger circadian rhythm – as indicated  
234 by a higher normalized power – than UWS patients in the uncorrected data ( $Z(n_1=11,$   
235  $n_2=18)=2.16, p=.031, r=.40$ ), this difference was only visible by trend in the corrected data  
236 ( $Z(n_1=11, n_2=18)=1.84, p=.065, r=.34$ ; cf. *Figure 3 B*).

237

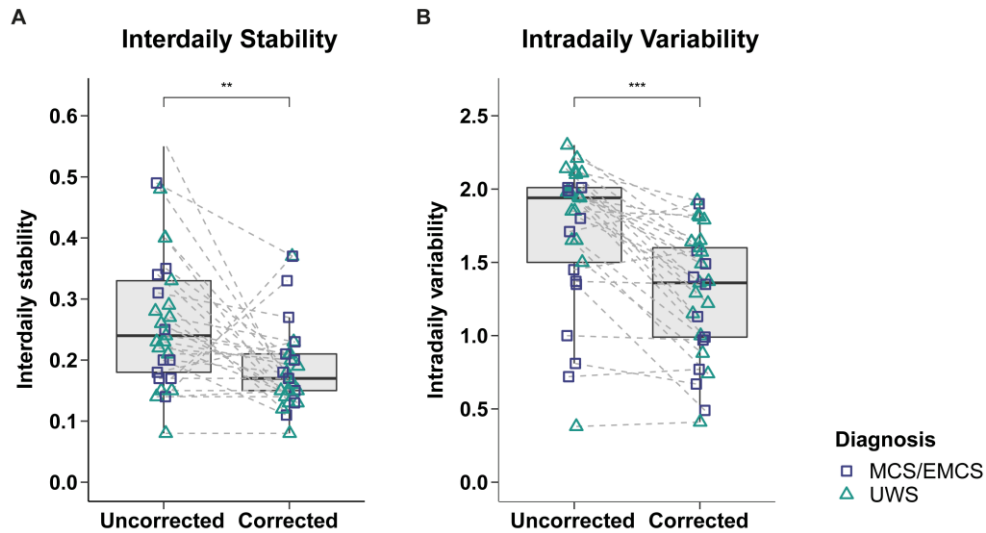

238

239 **Figure 2. Interdaily stability (A) and intradaily variability (B) in uncorrected vs. corrected data. A)**  
 240 **Interdaily stability (IS).** The IS was overestimated and significantly higher in the uncorrected data (IS  
 241 approaches 0 for Gaussian noise and converges to 1 for perfect IS.). UWS and MCS/EMCS patients did not  
 242 differ in both corrected and uncorrected data (*cf. Figures e-4 A-B in the supplementary material*). **B) Intradaily**  
 243 **variability (IV).** The IV was also overestimated and significantly higher in the uncorrected data (IV converges  
 244 to 0 for a perfect sine wave [i.e. no IV] and approaches 2 for Gaussian noise. Values > 2 indicate an ultradian  
 245 component with a period length of 2 h.). UWS and MCS/EMCS patients only differed in the uncorrected data  
 246 (*cf. Figures e-4 C-D in the supplementary material*). Horizontal lines represent the medians, boxes the  
 247 interquartile range (IQR; distance between the 1<sup>st</sup> [Q1] and 3<sup>rd</sup> quartile [Q3]), whiskers extend at most to Q1-  
 248 1.5\*IQR (lower whisker) and Q3+1.5\*IQR (upper whisker). Asterisks indicate significance: \*\*\* $p \leq .001$ , \*\* $p \leq$   
 249  $.01$ . Abbreviations: MCS = minimally conscious state, EMCS = Exit MCS, UWS = unresponsive wakefulness  
 250 syndrome.

251

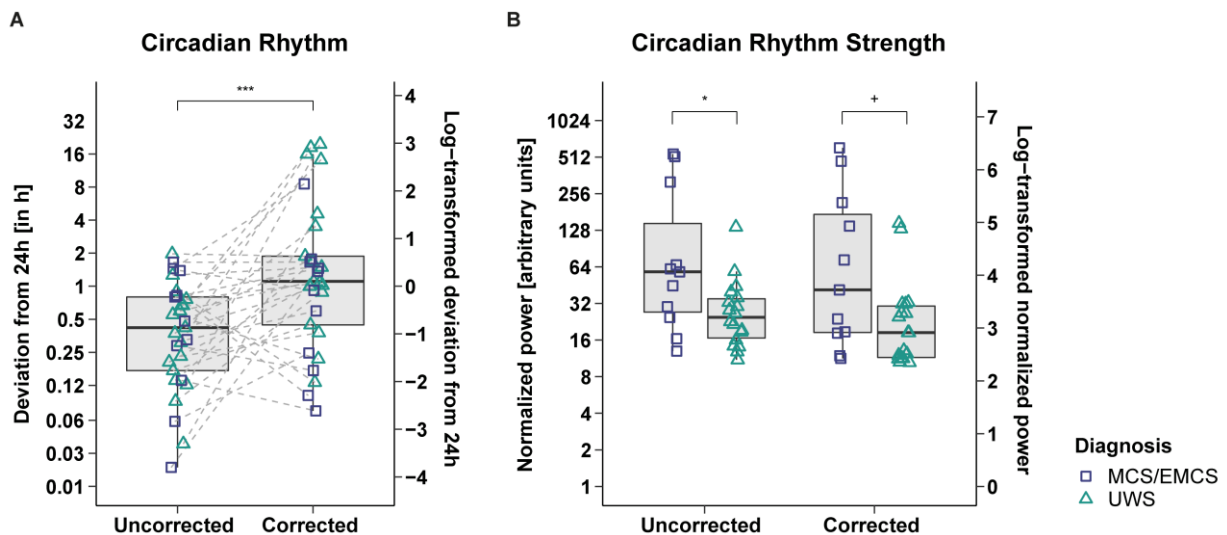

252

253 **Figure 3. Circadian rhythmicity contrasted between datasets (A) and circadian rhythm strength**  
 254 **contrasted between diagnoses (B). A) Deviation of the patients' peak period from 24 h.** The patients'  
 255 activity rhythms were significantly better aligned with a 24 h-rhythm in the uncorrected data (=less deviation  
 256 from 24 h). UWS and MCS/EMCS patients did not differ in both uncorrected and corrected data (*cf. Figures e-4*  
 257 *E-F in the supplementary material*). **B) Normalized power of the patients' peaks closest to 24 h.** UWS and  
 258 MCS/EMCS patients differed in the uncorrected and corrected data. Pooling both patient groups the normalized  
 259 power did not differ between datasets (*cf. Figure e-3 in the supplementary material*). For better illustration the  
 260 data was log-transformed (right-hand y-axes); statistics were performed on the untransformed data (left-hand y-  
 261 axes). Horizontal lines represent the medians, boxes the interquartile range (IQR; distance between the 1<sup>st</sup> [Q1]  
 262 and 3<sup>rd</sup> quartile [Q3]), whiskers extend at most to Q1-1.5\*IQR (lower whisker) and Q3+1.5\*IQR (upper

263 whisker). Asterisks indicate significance: \*\*\* $p \leq .001$ , \* $p \leq .05$ , + $p \leq .1$ . Abbreviations: MCS = minimally  
264 conscious state, EMCS = Exit MCS, UWS = unresponsive wakefulness syndrome.

265

## 266 *Day vs. Night*

267 Patients' activity levels were higher during day than night in both uncorrected  
268 ( $Z(N=29)=-4.13$ ,  $p<.001$ ,  $r=.77$ ) and corrected data ( $Z(N=29)=-3.31$ ,  $p<.001$ ,  $r=.61$ ) with  
269 effect sizes being larger in the uncorrected data (cf. *Figure e-5* in the supplementary material).

270 Furthermore, day-night differences were more pronounced in MCS/EMCS patients than in  
271 UWS patients in both datasets (uncorrected data: MCS/EMCS:  $Z(n=11)=-2.89$ ,  $p=.004$ ,  $r=.87$ ;  
272 UWS:  $Z(n=18)=-2.92$ ,  $p=.004$ ,  $r=.69$ ; corrected data: MCS/EMCS:  $Z(n=11)=-2.45$ ,  $p=.014$ ,  
273  $r=.74$ ; UWS:  $Z(n=18)=-2.22$ ,  $p=.026$ ,  $r=.52$ ; cf. *Figure 4*).

274 When comparing activity levels during day and night between diagnoses, we found that  
275 MCS/EMCS patients show higher mean activity than UWS patients during day and night in  
276 both uncorrected (day:  $Z(n_1=11, n_2=18)=2.16$ ,  $p=.031$ ,  $r=.40$ ; night:  $Z(n_1=11, n_2=18)=2.20$ ,  
277  $p=.028$ ,  $r=.41$ ) and corrected data (day:  $Z(n_1=11, n_2=18)=-2.69$ ,  $p=.007$ ,  $r=.50$ ; night:  
278  $Z(n_1=11, n_2=18)=3.06$ ,  $p=.002$ ,  $r=.57$ ) with larger effect sizes for comparisons between  
279 diagnoses in the corrected dataset (cf. *Figures e-6 A-D* in the supplementary material).

280

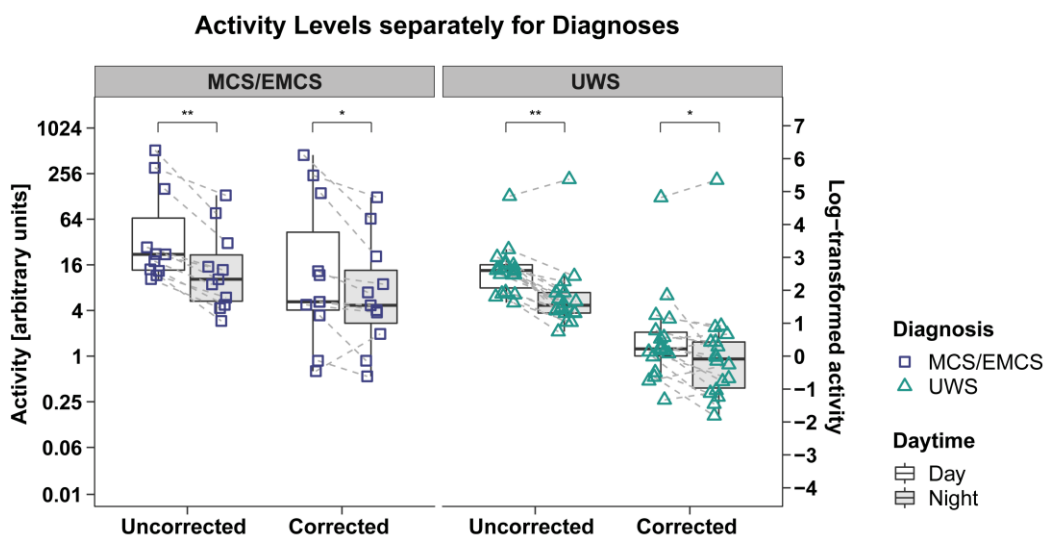

281

282 **Figure 4. Patients' mean activity during day vs. night in uncorrected and corrected data separately for**  
283 **diagnoses.** The mean activity was significantly higher during the day (7am – 9pm) than during the night (9pm –



284 7am) in both uncorrected and corrected data in UWS and MCS/EMCS patients with stronger day-night effects in  
285 MCS/EMCS patients and uncorrected data. For better illustration the data was log-transformed (right-hand y-  
286 axes); statistics were performed on the untransformed data (left-hand y-axes). Horizontal lines represent the  
287 medians, boxes the interquartile range (IQR; distance between the 1<sup>st</sup> [Q1] and 3<sup>rd</sup> quartile [Q3]), whiskers  
288 extend at most to  $Q1-1.5*IQR$  (lower whisker) and  $Q3+1.5*IQR$  (upper whisker). Asterisks indicate  
289 significance:  $**p \leq .01$ ,  $*p \leq .05$ . Abbreviations: MCS = minimally conscious state, EMCS = Exit MCS, UWS =  
290 unresponsive wakefulness syndrome.

291

## 292 **Discussion**

293

294 Our results indicate that actigraphy data from clinical populations suffering from severe  
295 motor impairments such as DOC patients is strongly influenced by external movements, i.e.  
296 movements not initiated by the patients. Not correcting for these external movements leads to  
297 an overestimation of the patients' circadian rhythmicity rendering the validity of the  
298 uncorrected data highly questionable.

299 Analyses revealed that using uncorrected data resulted in an overestimation of how well  
300 patients' circadian rhythms were entrained to a 24 h zeitgeber (as indicated by interdaily  
301 stability [IS] and the deviation from the peak closest to 24 h in the periodogram analyses) and  
302 in more pronounced day-night differences. Specifically, 25/30 patients (83%) showed a  
303 circadian rhythm (i.e. deviation less than 1 h from 24 h) in the uncorrected data (cf. *Table S1*  
304 in the supplementary material). This is well in line with the results from Cruse et al.<sup>3</sup> who  
305 found a circadian rhythm in 46/55 patients (84%). However, after correcting the actigraphy  
306 data for external movements we found a circadian rhythm in only 13/30 patients (43%) (cf.  
307 *Table S2* in the supplementary material). This is most probably because nursing activities,  
308 therapies, and visiting times that cause such external movements follow a regular (daily)  
309 schedule and are more prominent during the day than during the night. Thus, previous studies  
310 investigating circadian rhythmicity of activity levels in DOC patients might be subject to this  
311 bias. Furthermore, we found higher variability within the 24 h day (as indicated by higher  
312 intradaily variability [IV]) in the uncorrected data, thus suggesting a stronger fragmentation of  
313 the patients' activity. In other words, IV increases when periods of low "real" patient activity



314 are followed by strong activity initiated by moving the patient externally. Thus, while external  
315 movements occur in a regular pattern *over several days* (i.e. resulting in more IS), the  
316 variability of the measured activity *within a day* is increased due to external movements.

317 When looking at day-night variations of activity levels separately for patient groups,  
318 patterns between diagnoses stayed the same in the corrected and uncorrected dataset with  
319 MCS/EMCS patients showing stronger day-night effects than UWS patients (cf. *Figure 4*) as  
320 well as higher mean activity during day and night (cf. *Figures e-6 A-D* in the supplementary  
321 material); wherefore one might argue that the correction of actigraphy data is dispensable.  
322 However, as soon as the amount of external movements differs between UWS and  
323 MCS/EMCS patients, we will get distorted results when contrasting actigraphy data between  
324 diagnoses. Even in our sample, where all of the patients were expected to receive equivalent  
325 levels of care, therapies and visits, the results from contrasting UWS and MCS/EMCS  
326 patients in the uncorrected data differed from the corrected data when looking at IV (cf.  
327 *Figures e-4 C-D* in the supplementary material). Specifically, while UWS patients showed a  
328 significantly higher IV as compared to MCS/EMCS patients in the uncorrected dataset, no  
329 difference could be detected after correcting for external movements.

330 Given the overestimation of circadian rhythms in the uncorrected dataset and the  
331 differing results of the two datasets when contrasting diagnoses, we suggest to use the  
332 corrected dataset when comparing actigraphy data of UWS and MCS/EMCS patients. Our  
333 analyses between diagnoses based on the corrected dataset revealed that the activity during  
334 both day and night was higher in MCS/EMCS patients than in UWS patients (cf. *Figures e-6*  
335 *B+D* in the supplementary material) and generally in patients with higher CRS-R scores (cf.  
336 *Figure e-7* in the supplementary material). Also, MCS/EMCS patients had more pronounced  
337 circadian rhythms (i.e. normalized power; cf. *Figure 3B*). This indicates more preserved  
338 circadian rhythms in MCS/EMCS patients and is well in line with previous studies that  
339 investigated circadian rhythms in DOC patients. Specifically, these studies showed that a

340 higher integrity of circadian temperature and melatonin rhythms predict a richer behavioral  
341 repertoire, which is directly related to results of CRS-R assessments<sup>5, 12</sup>. Also on a brain level,  
342 day-night changes of EEG signal complexity are more pronounced in MCS than in UWS  
343 patients (with significantly higher signal complexity during day than during night<sup>25</sup>), and  
344 periods of “daytime wakefulness” and “night-time sleep” are better distinguishable in MCS  
345 than in UWS patients<sup>26</sup>.

346 Besides this, the general usefulness of actigraphy data in severely brain-injured  
347 individuals especially for diagnostic and prognostic purposes seems questionable as the  
348 validity of motor data is severely limited by several factors such as motor impairments,  
349 spasticity and the usage of muscle relaxants in these patients. In a previous study of our lab,  
350 we did not find any relation between the IS of the patients’ physical activity levels and the  
351 CRS-R scores<sup>5</sup>. In the current study, IS correlated positively only with the motor subscale  
352 score, but not with the other subscale scores. Moreover, the effect was gone when contrasting  
353 UWS and MCS patients. We also did not find any significant correlations of the CRS-R  
354 scores with IV and the patient’s period length (i.e. deviation from the peak closest to 24 h),  
355 wherefore we should be careful when drawing associations between circadian variations of  
356 physical activity in DOC patients and consciousness levels (cf. *Figure e-7* in the  
357 supplementary material). Instead, other measures such as hormones (i.e. melatonin(-sulfate))  
358 seem to better describe circadian rhythms in DOC patients; i.e. while we found a circadian  
359 rhythm in the corrected actigraphy data in only 13/30 patients (43%) in the current study (cf.  
360 *Table S2* in the supplementary material), 19/21 patients (90%) showed a circadian  
361 melatoninsulfate rhythm in our previous study<sup>5</sup>.

362 To summarize, our study shows that actigraphy from DOC patients does not exclusively  
363 reflect the patients’ activity as it is strongly influenced by external movements, which leads to  
364 an overestimation of the circadian rhythmicity of the activity initiated by the patients  
365 themselves. Consequently, actigraphy data needs to be corrected to allow for meaningful

366 conclusions about circadian rhythms in DOC patients. Considering this correction, we found  
367 that MCS/EMCS patients show higher mean activity during the day and night as well as  
368 stronger circadian rhythms than UWS patients. However, the general usefulness of actigraphy  
369 in DOC patients should be considered carefully; especially with regards to frequent motor  
370 impairments, spasticity and the usage of muscle relaxants in these patients. Thus, while  
371 actigraphy is a tool that received increasing attention in measuring arousal because of its  
372 efficiency regarding costs and time, it has to be treated with caution in clinical populations  
373 with severe motor impairments such as DOC patients.

374

### 375 **Disclosure**

376 The authors report no disclosures relevant to the manuscript.

377

### 378 **Study funding**

379 MA is and CB was supported by a grant from the Austrian Science Fund (FWF; Y-777)  
380 and the Doctoral College “Imaging the Mind” (FWF; W1233-G17). CB was additionally  
381 supported by the Konrad-Adenauer-Stiftung e.V. and is supported by an FWF-funded Erwin-  
382 Schroedinger Fellowship (J-4243), a grant from the Freiwillige Akademische Gesellschaft  
383 Basel as well as a grant from the Psychiatric Hospital of the University of Basel.

384

### 385 **Authors' contributions**

386 Study design: MaS, CB; Data acquisition: MA, CB, MR, GP, MoS, ABK; Data analysis  
387 and interpretation: MA, CB, MaS, MR; Drafting the manuscript: MA, CB, MaS; Critical  
388 revision of the manuscript: CB, MR, GP, MoS, ABK, ET, MaS.

389

390 **Acknowledgements**

391           We thank Sarah Haberl and Julius Köppen as well as the staff at the Albert-Schweitzer-  
392 Klinik Graz and the Gunther-Ladurner Pflegezentrum Salzburg for their constant support and  
393 help with the data collection.

394

## References

1. Ancoli-Israel S, Cole R, Alessi C, Chambers M, Moorcroft W, Pollak CP. The role of actigraphy in the study of sleep and circadian rhythms. *Sleep* 2003;26:342-392.
2. Bekinschtein T, Cologan V, Dahmen B, Golombek D. You are only coming through in waves: wakefulness variability and assessment in patients with impaired consciousness. *Prog Brain Res* 2009;177:171-189.
3. Cruse D, Thibaut A, Demertzi A, et al. Actigraphy assessments of circadian sleep-wake cycles in the Vegetative and Minimally Conscious States. *BMC Med* 2013;11:18.
4. De Weer AS, Da Ros M, Berre J, Melot C, Goldman S, Peigneux P. Environmental influences on activity patterns in altered states of consciousness. *Eur J Neurol* 2011;18:1432-1434.
5. Blume C, Angerer M, Raml M, et al. Healthier rhythm, healthier brain? Integrity of circadian melatonin and temperature rhythms relates to the clinical state of brain-injured patients. *Eur J Neurol* 2019.
6. Laureys S. The neural correlate of (un)awareness: lessons from the vegetative state. *Trends Cogn Sci* 2005;9:556-559.
7. Giacino JT, Ashwal S, Childs N, et al. The minimally conscious state: definition and diagnostic criteria. *Neurology* 2002;58:349-353.
8. Bruno MA, Vanhaudenhuyse A, Thibaut A, Moonen G, Laureys S. From unresponsive wakefulness to minimally conscious PLUS and functional locked-in syndromes: recent advances in our understanding of disorders of consciousness. *J Neurol* 2011;258:1373-1384.
9. Kalmar K, Giacino JT. The JFK Coma Recovery Scale--Revised. *Neuropsychol Rehabil* 2005;15:454-460.
10. Teasdale G, Jennett B. Assessment of coma and impaired consciousness. A practical scale. *Lancet* 1974;2:81-84.

11. Andrews K, Murphy L, Munday R, Littlewood C. Misdiagnosis of the vegetative state: retrospective study in a rehabilitation unit. *BMJ* 1996;313:13-16.
12. Blume C, Lechinger J, Santhi N, et al. Significance of circadian rhythms in severely brain-injured patients: A clue to consciousness? *Neurology* 2017;88:1933-1941.
13. Santhi N, Lazar AS, McCabe PJ, Lo JC, Groeger JA, Dijk DJ. Sex differences in the circadian regulation of sleep and waking cognition in humans. *Proc Natl Acad Sci U S A* 2016;113:E2730-2739.
14. Schmidt C, Collette F, Cajochen C, Peigneux P. A time to think: circadian rhythms in human cognition. *Cogn Neuropsychol* 2007;24:755-789.
15. Fukudome Y, Abe I, Saku Y, et al. Circadian blood pressure in patients in a persistent vegetative state. *Am J Physiol* 1996;270:R1109-1114.
16. Pattoneri P, Tirabassi G, Pela G, Astorri E, Mazzucchi A, Borghetti A. Circadian blood pressure and heart rate changes in patients in a persistent vegetative state after traumatic brain injury. *J Clin Hypertens (Greenwich)* 2005;7:734-739.
17. R: A language and environment for statistical computing. [computer program]. Vienna, Austria: 2015.
18. Witting W, Kwa IH, Eikelenboom P, Mirmiran M, Swaab DF. Alterations in the circadian rest-activity rhythm in aging and Alzheimer's disease. *Biol Psychiatry* 1990;27:563-572.
19. Blume C, Santhi N, Schabus M. 'nparACT' package for R: A free software tool for the non-parametric analysis of actigraphy data. *MethodsX* 2016;3:430-435.
20. Scargle JD. Studies in Astronomical Time-Series Analysis .2. Statistical Aspects of Spectral-Analysis of Unevenly Spaced Data. *Astrophys J* 1982;263:835-853.
21. Lomb NR. Least-Squares Frequency-Analysis of Unequally Spaced Data. *Astrophys Space Sci* 1976;39:447-462.

22. Ruf T. The Lomb-Scargle periodogram in biological rhythm research: Analysis of incomplete and unequally spaced time-series. *Biological Rhythm Research* 1999;30:178-201.
23. Czeisler CA, Duffy JF, Shanahan TL, et al. Stability, precision, and near-24-hour period of the human circadian pacemaker. *Science* 1999;284:2177-2181.
24. Cohen J. *Statistical power analysis for the behavioral sciences*, 2nd ed. Hillsdale, N.J.: L. Erlbaum Associates, 1988.
25. Wislowska M, Del Giudice R, Lechinger J, et al. Night and day variations of sleep in patients with disorders of consciousness. *Sci Rep* 2017;7:266.
26. Wielek T, Lechinger J, Wislowska M, et al. Sleep in patients with disorders of consciousness characterized by means of machine learning. *PLoS One* 2018;13:e0190458.
